# Supplementary material for: The Transcriptional Network Structure of a Myeloid Cell: A Computational Approach
Source: Hindawi journal article supplement (doi:10.1155/2017/4858173), 2017-01-01
Supplement: f1 [file 4858173.f1.pdf]

Supplementary material 1. Expression time series of the Top10 (upper) and Bottom10 (lower) FANTOM4 genes.

Each row represents one experimental measure at different time points (bold)

| <b>NRF1</b>   | <b>0</b> | <b>1</b> | <b>2</b> | <b>4</b> | <b>6</b> | <b>12</b> | <b>24</b> | <b>48</b> | <b>72</b> | <b>96</b> |
|---------------|----------|----------|----------|----------|----------|-----------|-----------|-----------|-----------|-----------|
| Q1(R1)        | 1912.82  | 1899.58  | 1222.65  | 1925.9   | 2269.97  | 1920.06   | 1088.79   | 1154.01   | 1198.74   | 1101.01   |
| Q1(R3)        | 1343.61  | 1080.04  | 1146.53  | 1387.4   | 1497.25  | 1077.25   | 900.57    | 764.5     | 1016.02   | 1008.98   |
|               | 1628.215 | 1489.81  | 1184.59  | 1656.65  | 1883.61  | 1498.655  | 994.68    | 959.255   | 1107.38   | 1054.995  |
| <b>SPIB</b>   | <b>0</b> | <b>1</b> | <b>2</b> | <b>4</b> | <b>6</b> | <b>12</b> | <b>24</b> | <b>48</b> | <b>72</b> | <b>96</b> |
| Q1(R1)        | 398.46   | 355.47   | 289.65   | 84.19    | 93.52    | 180.02    | 75.53     | 65.35     | 92.32     | 103.07    |
| Q1(R3)        | 233.97   | 199.01   | 156.02   | 87.03    | 63.57    | 111.69    | 36.51     | 46.33     | 65.08     | 52.53     |
|               | 316.215  | 277.24   | 222.835  | 85.61    | 78.545   | 145.855   | 56.02     | 55.84     | 78.7      | 77.8      |
| <b>TFAP2A</b> | <b>0</b> | <b>1</b> | <b>2</b> | <b>4</b> | <b>6</b> | <b>12</b> | <b>24</b> | <b>48</b> | <b>72</b> | <b>96</b> |
| Q1(R1)        | 478.37   | 404.16   | 309.58   | 732.84   | 829.68   | 1727.37   | 850.18    | 674.92    | 578.31    | 543.04    |
| Q1(R3)        | 109.36   | 158.76   | 239.33   | 553.72   | 542.11   | 392.62    | 341.79    | 194.9     | 475.17    | 505.48    |
|               | 293.865  | 281.46   | 274.455  | 643.28   | 685.895  | 1059.995  | 595.985   | 434.91    | 526.74    | 524.26    |
| <b>MYOD1</b>  | <b>0</b> | <b>1</b> | <b>2</b> | <b>4</b> | <b>6</b> | <b>12</b> | <b>24</b> | <b>48</b> | <b>72</b> | <b>96</b> |
| Q1(R1)        | 0.02     | 1.42     | 3.01     | 1.58     | 0.89     | 0.04      | 0.07      | 0.05      | 0.07      | 0.08      |
| Q1(R3)        | 0.02     | 0.03     | 0.03     | 1.67     | 0.03     | 0.04      | 0.05      | 0.04      | 0.04      | 0.04      |
|               | 0.02     | 0.725    | 1.52     | 1.625    | 0.46     | 0.04      | 0.06      | 0.045     | 0.055     | 0.06      |
| <b>TFAP2B</b> | <b>0</b> | <b>1</b> | <b>2</b> | <b>4</b> | <b>6</b> | <b>12</b> | <b>24</b> | <b>48</b> | <b>72</b> | <b>96</b> |
| Q1(R1)        | 0.03     | 1.62     | 3.55     | 0.03     | 0.03     | 0.05      | 0.09      | 0.07      | 0.09      | 0.1       |
| Q1(R3)        | 0.03     | 0.04     | 0.04     | 0.04     | 2.06     | 0.06      | 5.1       | 0.05      | 0.06      | 0.05      |
|               | 0.03     | 0.83     | 1.795    | 0.035    | 1.045    | 0.055     | 2.595     | 0.06      | 0.075     | 0.075     |
| <b>ARNT2</b>  | <b>0</b> | <b>1</b> | <b>2</b> | <b>4</b> | <b>6</b> | <b>12</b> | <b>24</b> | <b>48</b> | <b>72</b> | <b>96</b> |
| Q1(R1)        | 0.01     | 0.02     | 1.27     | 38.06    | 83.31    | 114.4     | 196.01    | 318.38    | 517.44    | 574.08    |
| Q1(R3)        | 0.01     | 0.02     | 0.61     | 21.74    | 35.85    | 34.6      | 83.04     | 135.01    | 230.47    | 290.9     |
|               | 0.01     | 0.02     | 0.94     | 29.9     | 59.58    | 74.5      | 139.525   | 226.695   | 373.955   | 432.49    |
| <b>SNAI2</b>  | <b>0</b> | <b>1</b> | <b>2</b> | <b>4</b> | <b>6</b> | <b>12</b> | <b>24</b> | <b>48</b> | <b>72</b> | <b>96</b> |
| Q1(R1)        | 13.21    | 12.76    | 130.13   | 148.05   | 62.72    | 21.33     | 19.77     | 29.25     | 16.66     | 13.72     |
| Q1(R3)        | 1.76     | 3.95     | 20.41    | 10.53    | 11.41    | 3.48      | 6.63      | 2.6       | 8.6       | 19.77     |
|               | 7.485    | 8.355    | 75.27    | 79.29    | 37.065   | 12.405    | 13.2      | 15.925    | 12.63     | 16.745    |
| <b>MYOG</b>   | <b>0</b> | <b>1</b> | <b>2</b> | <b>4</b> | <b>6</b> | <b>12</b> | <b>24</b> | <b>48</b> | <b>72</b> | <b>96</b> |
| Q1(R1)        | 388.24   | 109.51   | 30.37    | 32.52    | 71.02    | 141.62    | 18.78     | 39.36     | 52.82     | 24.86     |
| Q1(R3)        | 19.73    | 7.75     | 3.23     | 9.11     | 10.65    | 16.58     | 14.63     | 8.09      | 15.46     | 21.64     |
|               | 203.985  | 58.63    | 16.8     | 20.815   | 40.835   | 79.1      | 16.705    | 23.725    | 34.14     | 23.25     |
| <b>MYF5</b>   | <b>0</b> | <b>1</b> | <b>2</b> | <b>4</b> | <b>6</b> | <b>12</b> | <b>24</b> | <b>48</b> | <b>72</b> | <b>96</b> |
| Q1(R1)        | 1.55     | 2.4      | 1.12     | 1.99     | 0.98     | 2.4       | 1.36      | 0.92      | 2.13      | 1.87      |
| Q1(R3)        | 0.42     | 2.24     | 1.12     | 1.66     | 3.72     | 0.65      | 1.92      | 0.03      | 0.03      | 1.19      |
|               | 0.985    | 2.32     | 1.12     | 1.825    | 2.35     | 1.525     | 1.64      | 0.475     | 1.08      | 1.53      |
| <b>MYF6</b>   | <b>0</b> | <b>1</b> | <b>2</b> | <b>4</b> | <b>6</b> | <b>12</b> | <b>24</b> | <b>48</b> | <b>72</b> | <b>96</b> |
| Q1(R1)        | 0.51     | 0.02     | 0.63     | 0.74     | 0.02     | 0.04      | 0.06      | 0.05      | 0.06      | 0.07      |
| Q1(R3)        | 0.02     | 0.16     | 0.26     | 0.55     | 0.38     | 0.04      | 0.05      | 0.04      | 0.04      | 0.04      |
|               | 0.265    | 0.09     | 0.445    | 0.645    | 0.2      | 0.04      | 0.055     | 0.045     | 0.05      | 0.055     |

## Supplementary Material 1. Continuation

| <b>RUNX1</b>  | <b>0</b> | <b>1</b> | <b>2</b> | <b>4</b> | <b>6</b> | <b>12</b> | <b>24</b> | <b>48</b> | <b>72</b> | <b>96</b> |
|---------------|----------|----------|----------|----------|----------|-----------|-----------|-----------|-----------|-----------|
| Q1(R1)        | 14836.19 | 11320.35 | 7309.67  | 10305.06 | 9027.64  | 10290.21  | 5308.28   | 4504.74   | 2146.04   | 1878.69   |
| Q1(R3)        | 3929.63  | 5474.39  | 4459.87  | 5377.62  | 6033.79  | 4160.26   | 3347.3    | 1495.41   | 2142.14   | 2288.65   |
| <b>ARID5B</b> | <b>0</b> | <b>1</b> | <b>2</b> | <b>4</b> | <b>6</b> | <b>12</b> | <b>24</b> | <b>48</b> | <b>72</b> | <b>96</b> |
| Q1(R1)        | 17.93    | 21.36    | 16.68    | 223.51   | 455.36   | 177.86    | 180.97    | 316.66    | 199.29    | 84.92     |
| Q1(R3)        | 7.84     | 7.45     | 12.84    | 64.64    | 164.68   | 84.82     | 121.84    | 60.22     | 90.06     | 124.54    |
| <b>TFAP4</b>  | <b>0</b> | <b>1</b> | <b>2</b> | <b>4</b> | <b>6</b> | <b>12</b> | <b>24</b> | <b>48</b> | <b>72</b> | <b>96</b> |
| Q1(R1)        | 791      | 624.58   | 530.36   | 125.02   | 279.63   | 525.19    | 627.86    | 602.34    | 776.62    | 930.29    |
| Q1(R3)        | 494.3    | 429.25   | 203.58   | 79.28    | 105.23   | 176.93    | 242.32    | 287.54    | 326.56    | 359.03    |
| <b>POU6F1</b> | <b>0</b> | <b>1</b> | <b>2</b> | <b>4</b> | <b>6</b> | <b>12</b> | <b>24</b> | <b>48</b> | <b>72</b> | <b>96</b> |
| Q1(R1)        | 331.95   | 280.25   | 227.73   | 277.84   | 416.83   | 945.03    | 625.01    | 495.29    | 440.55    | 429.07    |
| Q1(R3)        | 127.41   | 118.24   | 128      | 277.5    | 478.11   | 675.39    | 521.27    | 591.04    | 530.11    | 470.08    |
| <b>ZIC2</b>   | <b>0</b> | <b>1</b> | <b>2</b> | <b>4</b> | <b>6</b> | <b>12</b> | <b>24</b> | <b>48</b> | <b>72</b> | <b>96</b> |
| Q1(R1)        | 16560.65 | 16227.59 | 21690.27 | 8556.75  | 8190.26  | 8567.82   | 3919.13   | 4175.03   | 3300.68   | 2981.4    |
| Q1(R3)        | 3704.27  | 3467.31  | 6794.92  | 3526.95  | 3453.75  | 2556.35   | 1873.26   | 1320.82   | 2066.16   | 2338.12   |
| <b>GTF2A1</b> | <b>0</b> | <b>1</b> | <b>2</b> | <b>4</b> | <b>6</b> | <b>12</b> | <b>24</b> | <b>48</b> | <b>72</b> | <b>96</b> |
| Q1(R1)        | 1921.08  | 1822.49  | 1664.75  | 7503.53  | 11683.4  | 7498.26   | 1549.35   | 1832.8    | 963.4     | 579.14    |
| Q1(R3)        | 518.8    | 1059.97  | 1397.13  | 3403.57  | 5047.46  | 4337.06   | 2152.05   | 876.46    | 961.21    | 1021.73   |
| <b>POU3F1</b> | <b>0</b> | <b>1</b> | <b>2</b> | <b>4</b> | <b>6</b> | <b>12</b> | <b>24</b> | <b>48</b> | <b>72</b> | <b>96</b> |
| Q1(R1)        | 4.54     | 2.45     | 16       | 15.23    | 34.74    | 535.1     | 677.04    | 679.59    | 313.22    | 183.78    |
| Q1(R3)        | 4.63     | 1.53     | 12.95    | 10.37    | 20.81    | 243.68    | 367.48    | 324.86    | 209.04    | 158.04    |
| <b>SMAD6</b>  | <b>0</b> | <b>1</b> | <b>2</b> | <b>4</b> | <b>6</b> | <b>12</b> | <b>24</b> | <b>48</b> | <b>72</b> | <b>96</b> |
| Q1(R1)        | 4199.09  | 5196.62  | 4796.03  | 3153.54  | 3233.04  | 2702.44   | 2665.38   | 2907.19   | 2399.19   | 2525.92   |
| Q1(R3)        | 1674.41  | 1696.32  | 1588.46  | 1152.8   | 1337.97  | 1353.34   | 1770.54   | 1388.1    | 1738.74   | 1524.24   |
| <b>ZHX2</b>   | <b>0</b> | <b>1</b> | <b>2</b> | <b>4</b> | <b>6</b> | <b>12</b> | <b>24</b> | <b>48</b> | <b>72</b> | <b>96</b> |
| Q1(R1)        | 880.34   | 247.06   | 364.73   | 211.46   | 397.59   | 708.21    | 455.73    | 277.28    | 297.07    | 334.63    |
| Q1(R3)        | 423.03   | 288.11   | 154.05   | 177.29   | 276.05   | 510.54    | 395.14    | 157.88    | 236.27    | 270.4     |
